# Supplementary material for: Function analysis of GhWRKY53 regulating cotton resistance to verticillium wilt by JA and SA signaling pathways
Source: Front Plant Sci. 2023 Jun 2;14:1203695. doi: 10.3389/fpls.2023.1203695 (PMC10272532; doi:10.3389/fpls.2023.1203695)
Supplement: Supplementary file 1 [file Table_1.xlsx]

## Sheet: Table S1
Table S1. The primers used for qRT-PCR and VIGS
Primer name	Sequences (5'-3')
GhUBQ7F	GAAGGCATTCCACCTGACCAAC
GhUBQ7R	CTTGACCTTCTTCTTCTTGTGCTTG
Ve-ITS1-F	AAAGTTTTAATGGTTCGCTAAGA
ST-VE1-R	CTTGGTCATTTAGAGGAAGTAA
QGhWRKY53F	GCCACAAAGCAAGTCCAGAAAT
QGhWRKY53R	GAAAGAAGTTGCCATCTCGGTA
QGhPALF	CCAATGGTGAACTCCACCCGTC
QGhPALR	TCGTCGGCGTAGGCATAGAGAT
QGhPR1F	AGTGCTGACCTATCGGGAAC
QGhPR1R	AGCACAACCAAGATGGACAG
QGhPDF1.2F	TTTCCTCCTCCTGGTTTACTCC
QGhPDF1.2R	TACTCCCGTTGTTTGACTTGGC
QGhAOS1F	AAATGGATTGGCAGGGCTGGAA
QGhAOS1R	GGTGGTTCGATCCGTAACGCTT
QGhLOXF	GATTTGGGGAACCCCGACAAGG
QGhLOXR	GTCTTGGGATCTGACTTGGCCG
VGhWRKY53F	GAATTCGGGCAAAAAGACATCCTGGG
VGhWRKY53R	GGTACCGAAAGAAGTTGCCATCTCGGT
VGhCHLIF	CGGAATTCTTCGGTGACCCTTATAAC
VGhCHLIR	GGGGTACCATCAAACCGTGCTCTTTC
